# Supplementary material for: Enhancing the magnetic properties (Curie temperature and magnetic anisotropy energy) of a 2D MXene (Ca 2 C) by stacking a vdW heterostructure with silicene
Source: Royal Society of Chemistry journal article supplement (doi:10.1039/d5cp03197d), 2025-12-23
Supplement: d5cp03197d1.pdf [file d5cp03197d1.pdf]

# **Enhancing the magnetic properties (Curie temperature and magnetic anisotropy energy) of a 2D MXene ( $\text{Ca}_2\text{C}$ ) by stacking a vdW heterostructure with silicene.**

Jonas Anversa,<sup>†,‡</sup> Rogério J. Baierle,<sup>‡</sup> and Paulo C. Piquini<sup>\*,‡</sup>

<sup>†</sup>*Instituto Federal de Educação, Ciência e Tecnologia do Rio Grande do Sul, Rua Nelsi Ribas Fritsch, 1111, Ibirubá, 98200–000, RS, Brazil*

<sup>‡</sup>*Departamento de Física, Universidade Federal de Santa Maria, 97105-900, Santa Maria, RS, Brazil*

E-mail: rbaierle@smail.ufsm.br

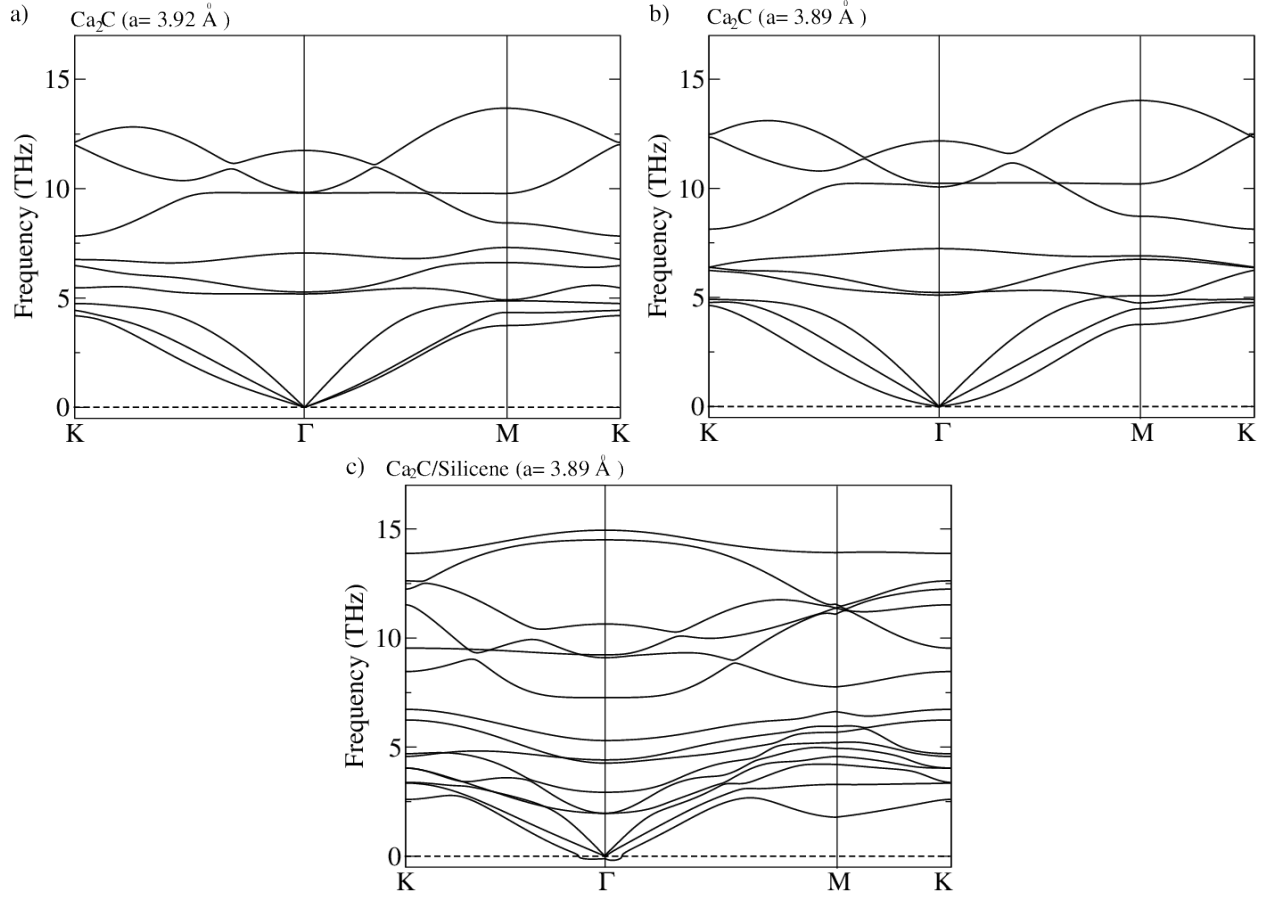

Figure 1: Calculated phonon spectrum: in a)  $\text{Ca}_2\text{C}$  optimized lattice parameter, b)  $\text{Ca}_2\text{C}$  in vdW lattice parameter and c) heterostructure vdW  $\text{Ca}_2\text{C}/\text{silicene}$  .

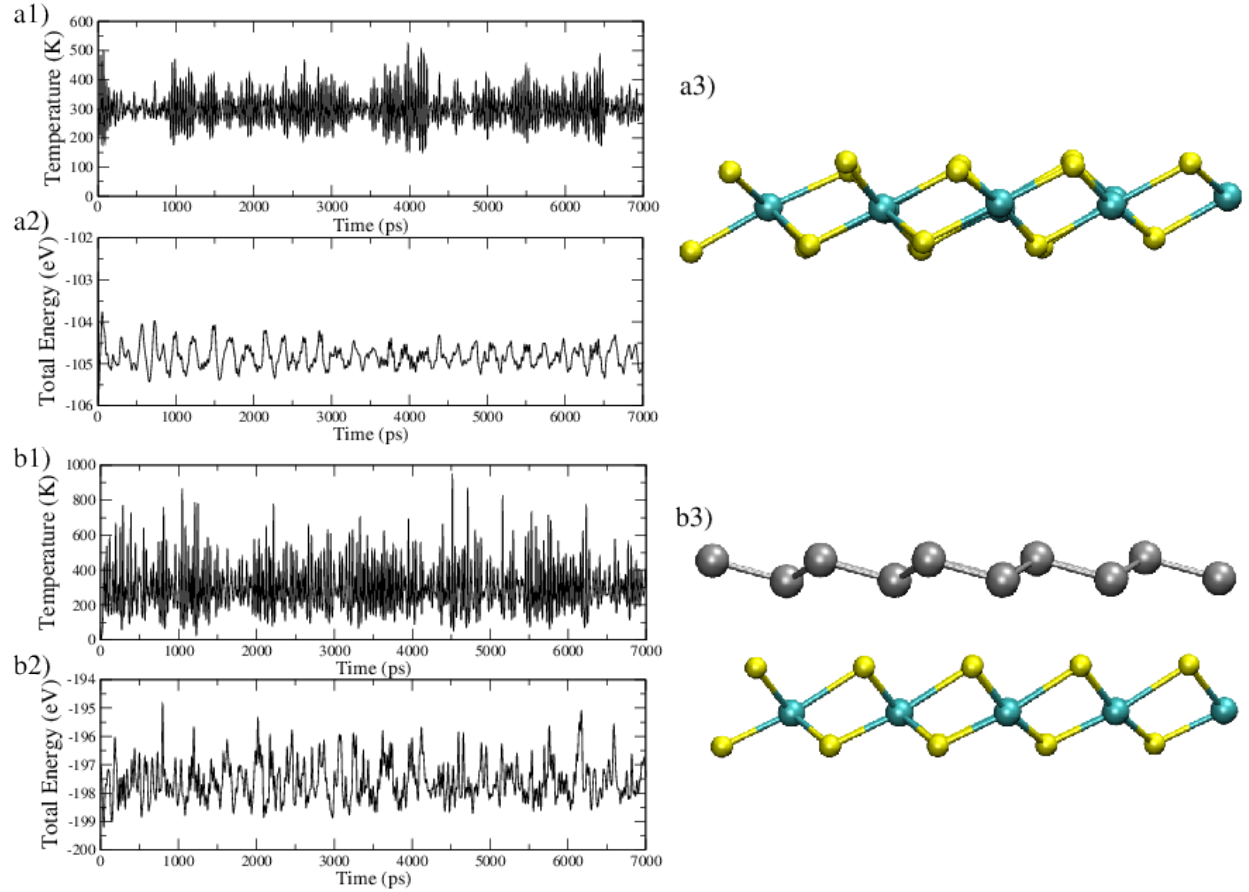

Figure 2: Molecular Dynamics calculations. Temperature and total energy as a function of the simulation time for the (a)  $\text{Ca}_2\text{C}$  monolayer and (b)  $\text{Ca}_2\text{C}$ /silicene van der Waals heterostructure, respectively.

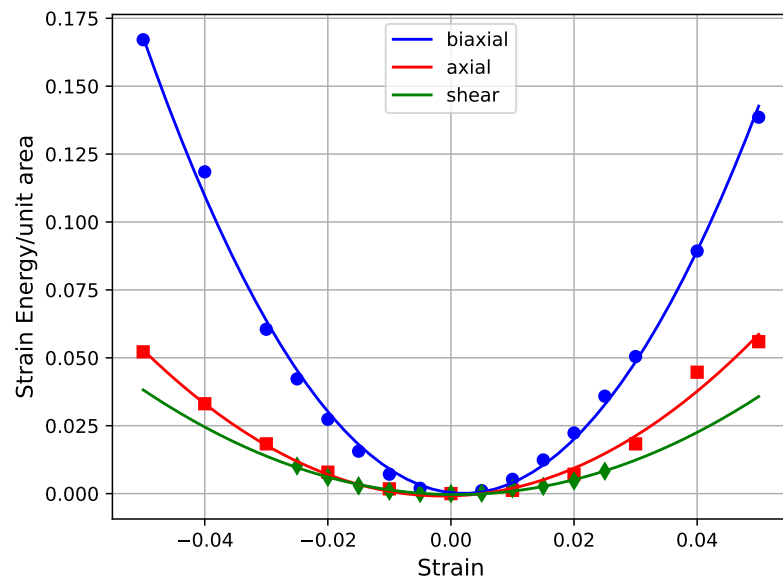

Figure 3: Calculated strain energy  $U(\varepsilon)$  as a function of the applied strain ( $\varepsilon$ ).

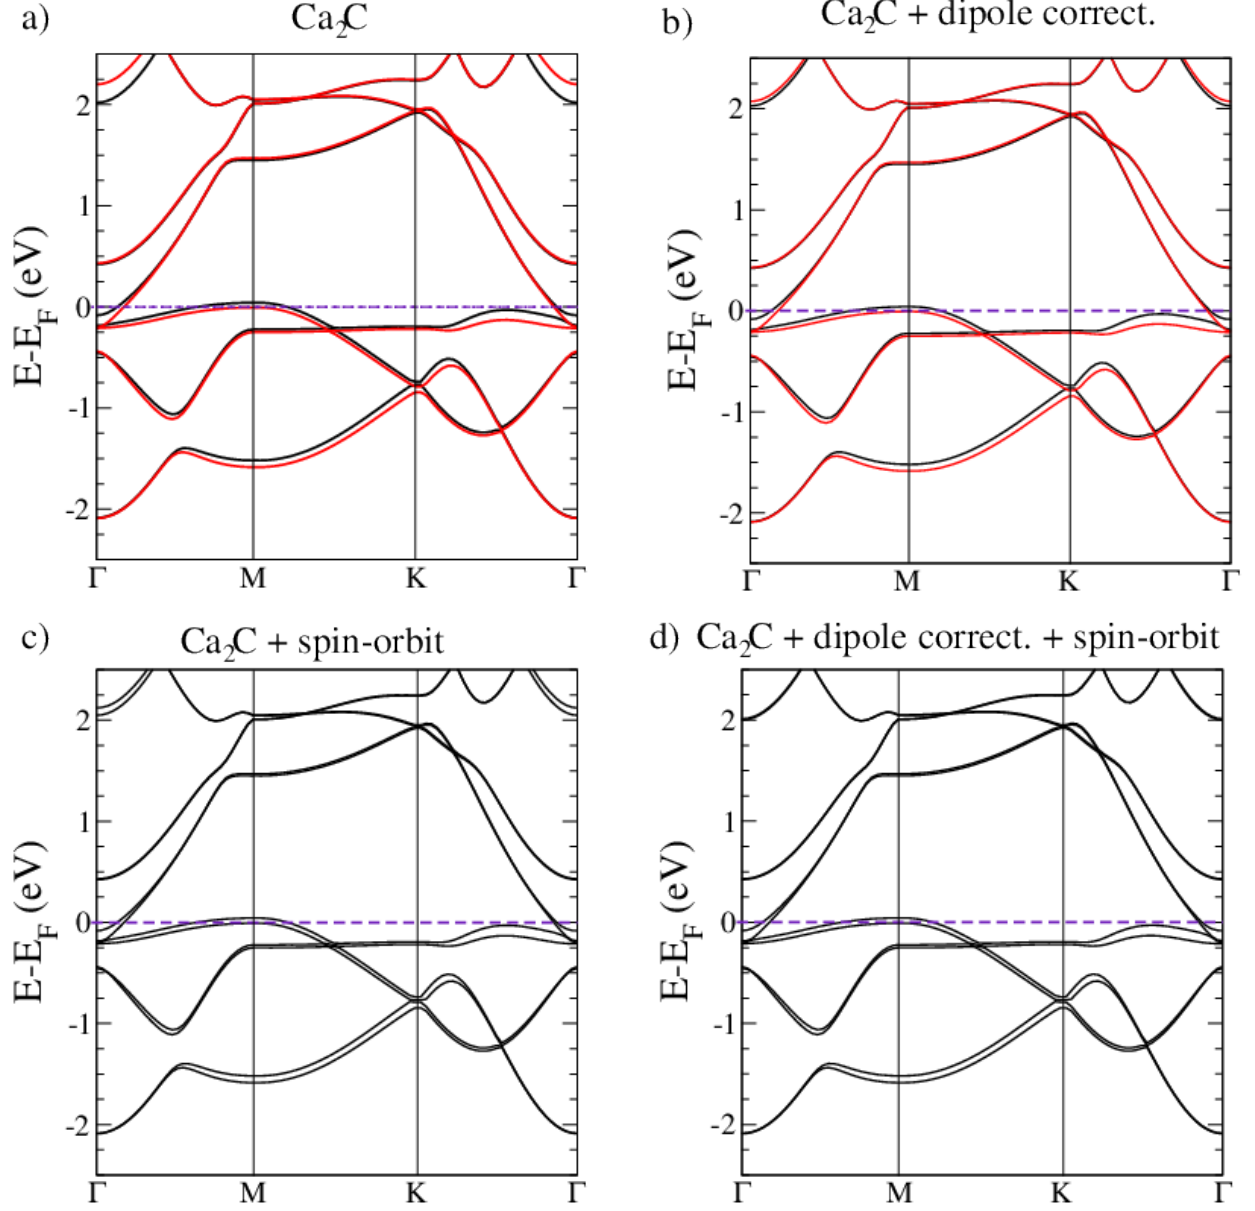

Figure 4: Calculated Electronic band structure for the  $\text{Ca}_2\text{C}$  monolayer: (a) PBE; (b) PBE with electric dipole correction, (c) PBE + SOC and (d) PBE + SOC + Electric dipole correction.

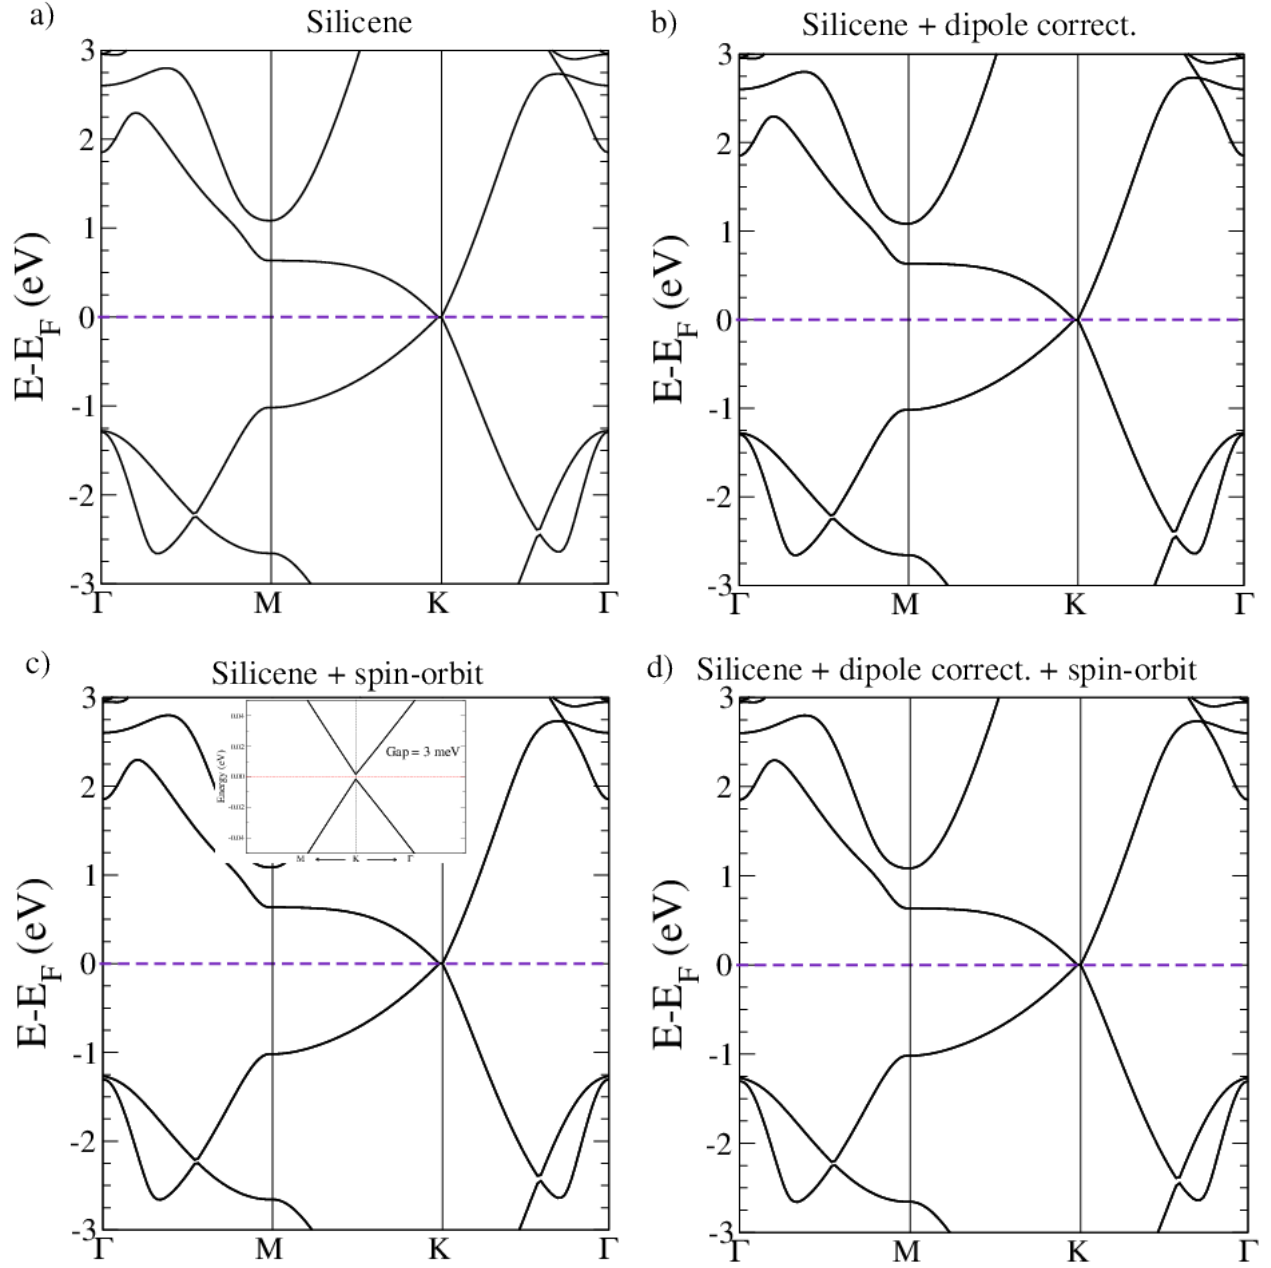

Figure 5: Calculated Electronic band structure for silicene: (a) PBE; (b) PBE with electric dipole correction, (c) PBE + SOC and (d) PBE +SOC + Electric dipole correction.

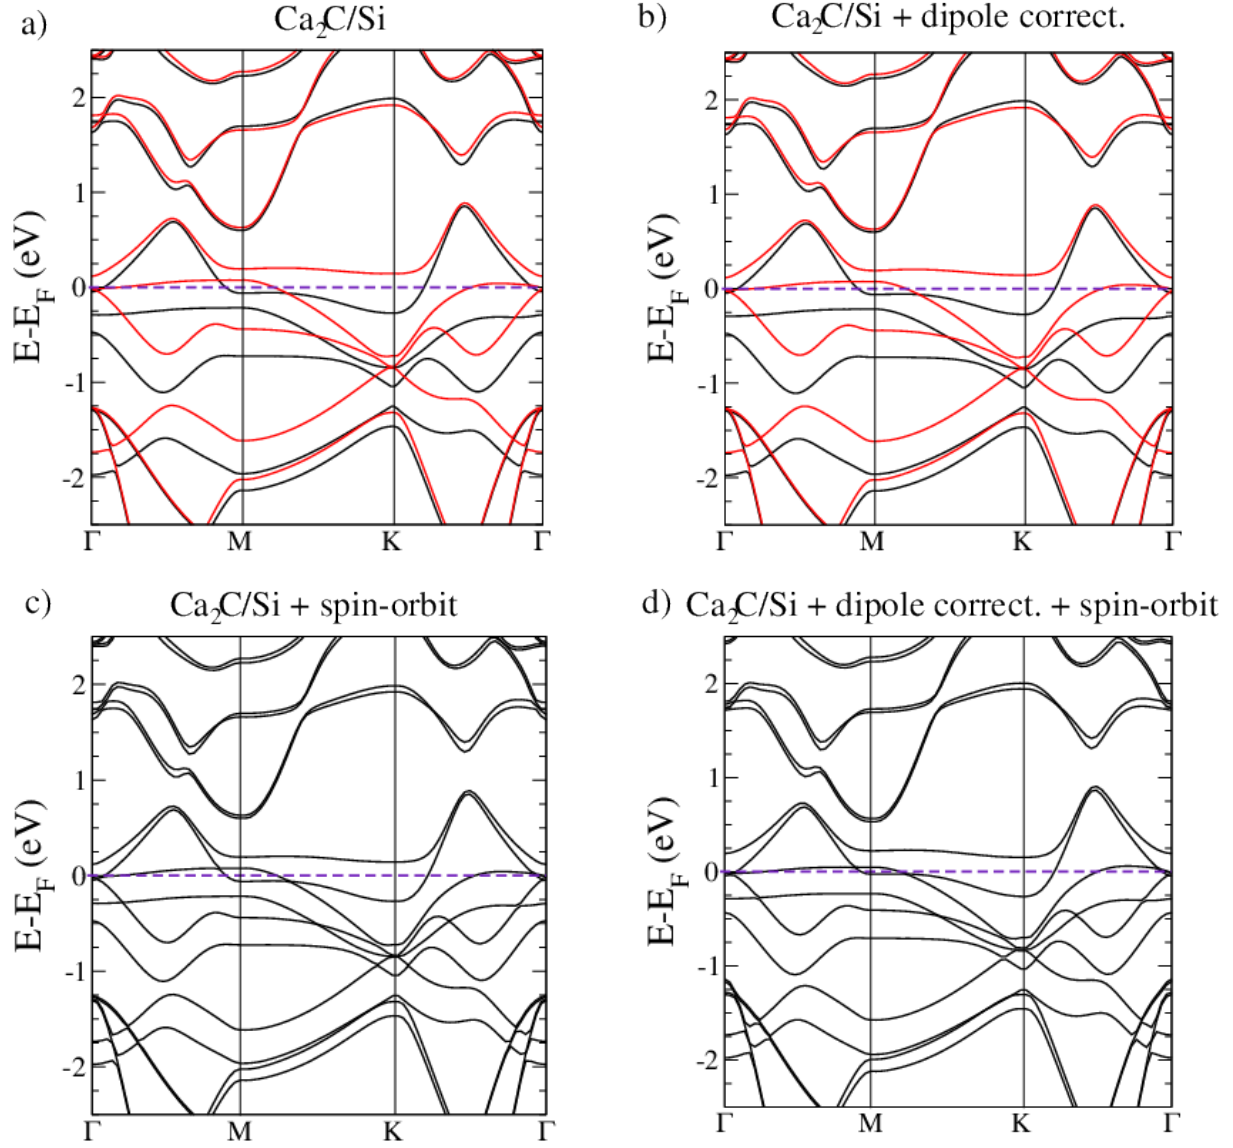

Figure 6: Calculated Electronic band structure for the vdW heterostructure ( $\text{Ca}_2\text{C/silicene}$ ): (a) PBE; (b) PBE with electric dipole correction, (c) PBE + SOC and (d) PBE +SOC + Electric dipole correction.

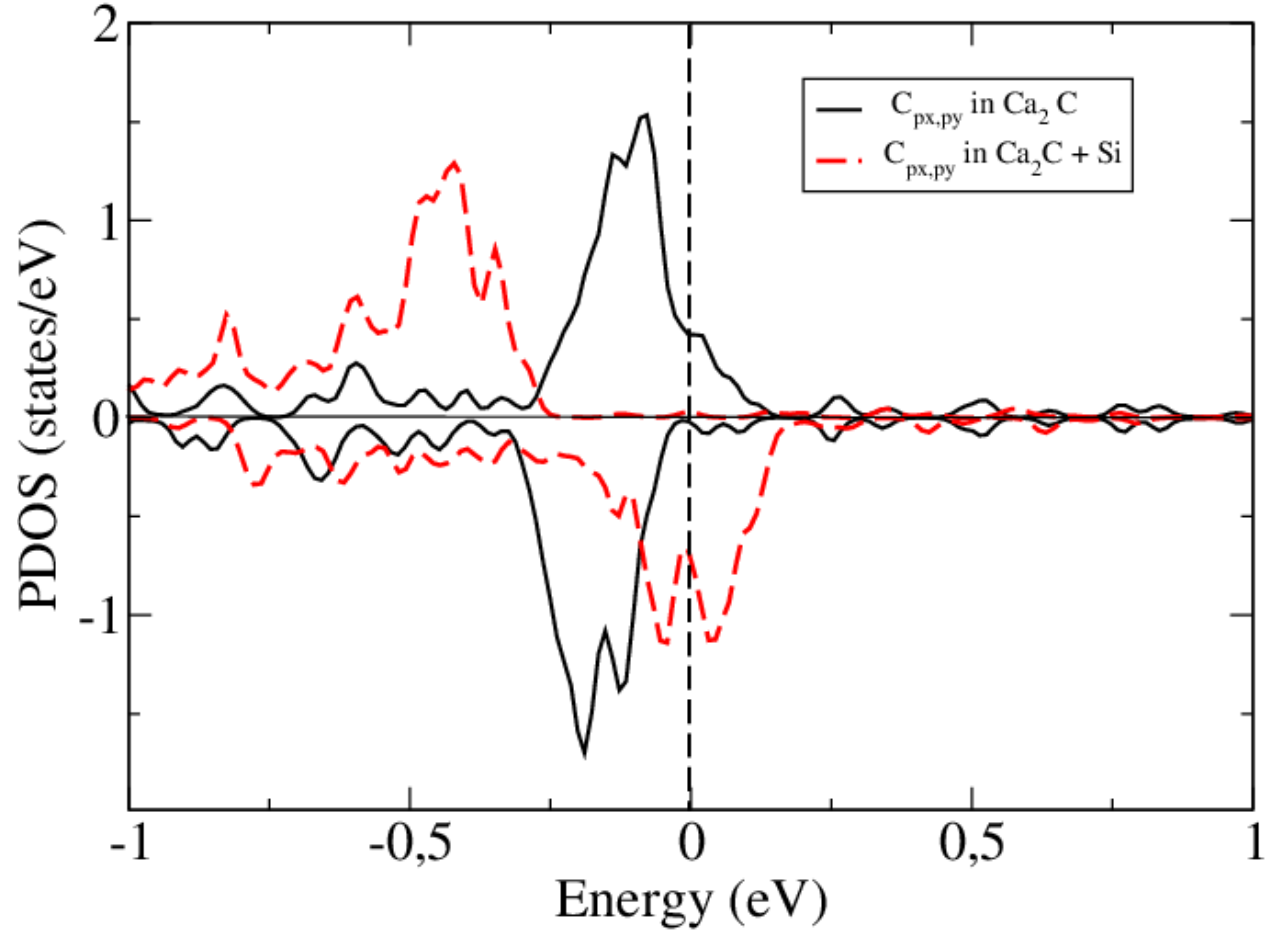

Figure 7: Projected Density of States for planar ( $p_x$  and  $p_y$ ) orbitals of the carbon in the  $\text{Ca}_2\text{C}$  and  $\text{Ca}_2\text{C}/\text{silicene}$  vdW heterostructure.



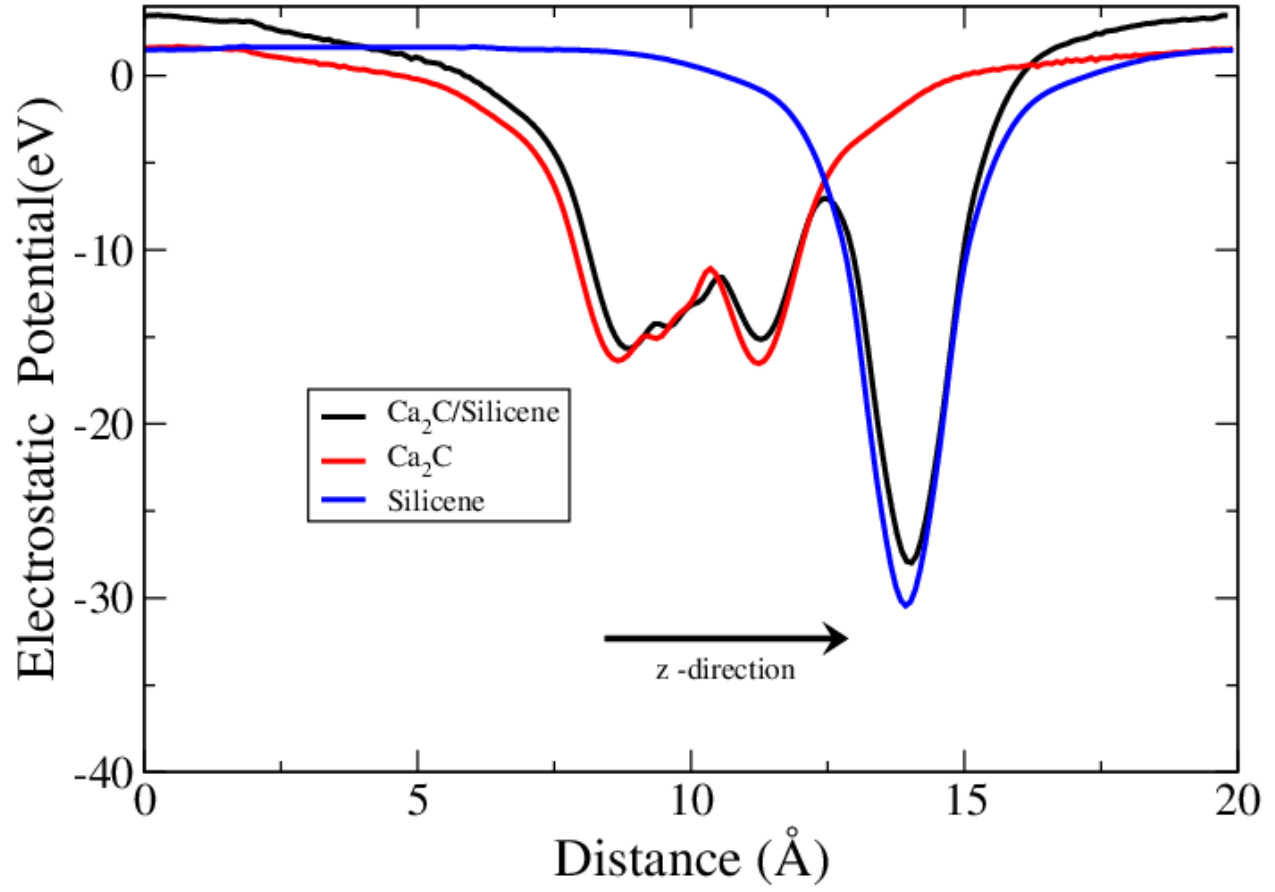

Figure 8: Calculated Electrostatic potentials of silicene,  $\text{Ca}_2\text{C}$ , and  $\text{Ca}_2\text{C}/\text{silicene}$  heterostructure.

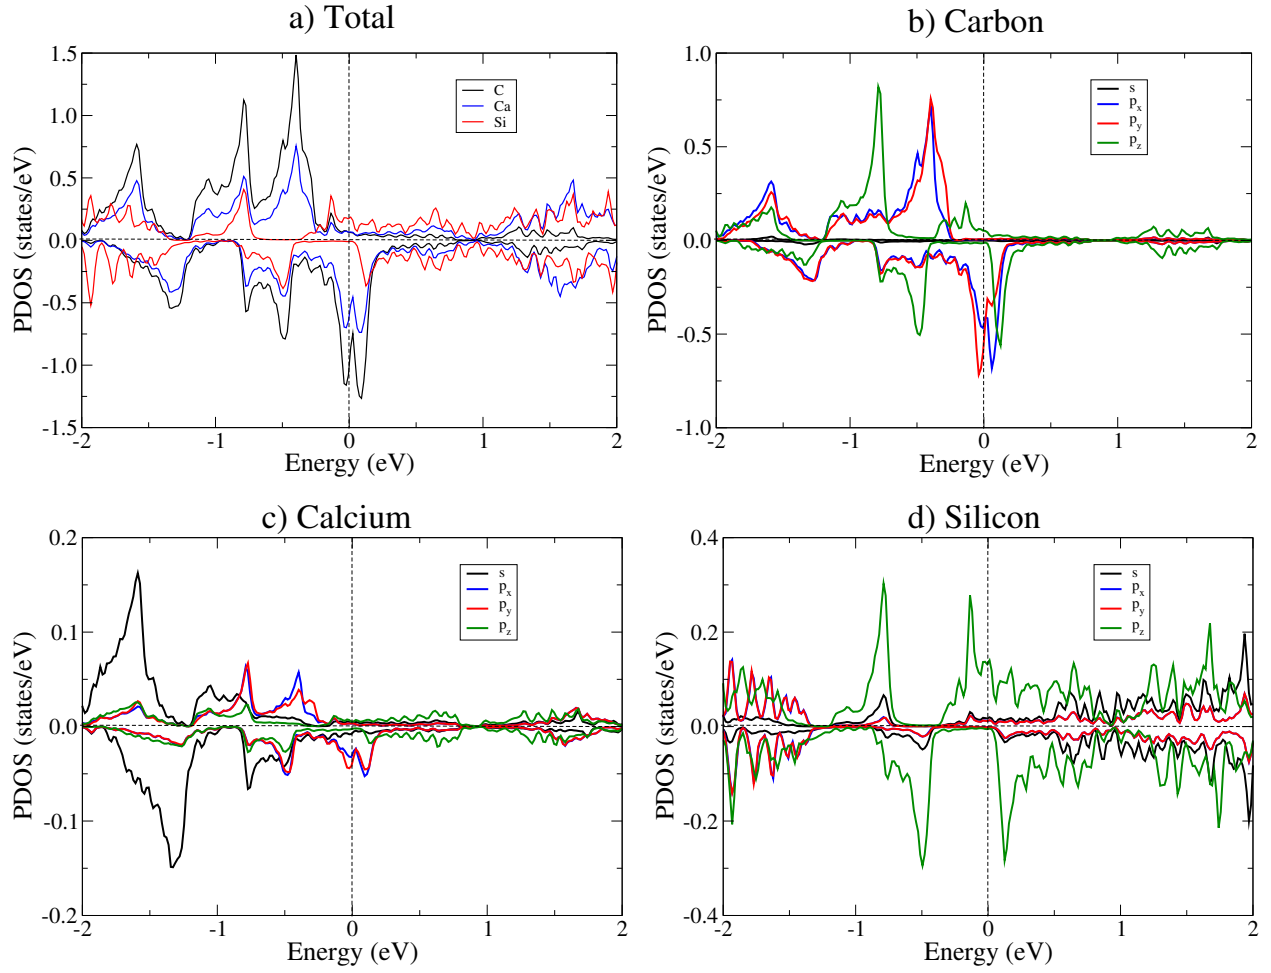

Figure 9: Projected Density of States: (a) on the atomic species; (b)-(d) on the atomic orbital for the C, Ca and Si atomic, respectively.

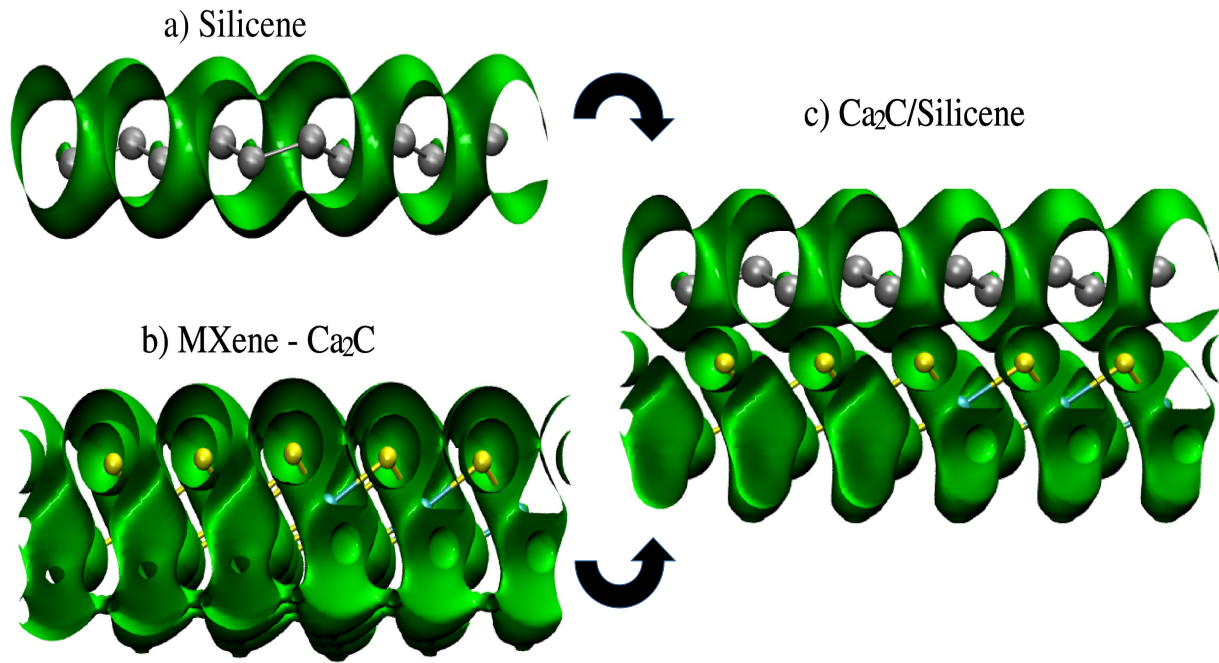

Figure 10: Electron Localization Function (ELF) for a) Silicene, b)  $\text{Ca}_2\text{C}$  and in c)  $\text{Ca}_2\text{C}/\text{Silicene}$  vdW heterostructure. The isovalue used was  $0.1 \text{ e}\text{\AA}^{-3}$ .

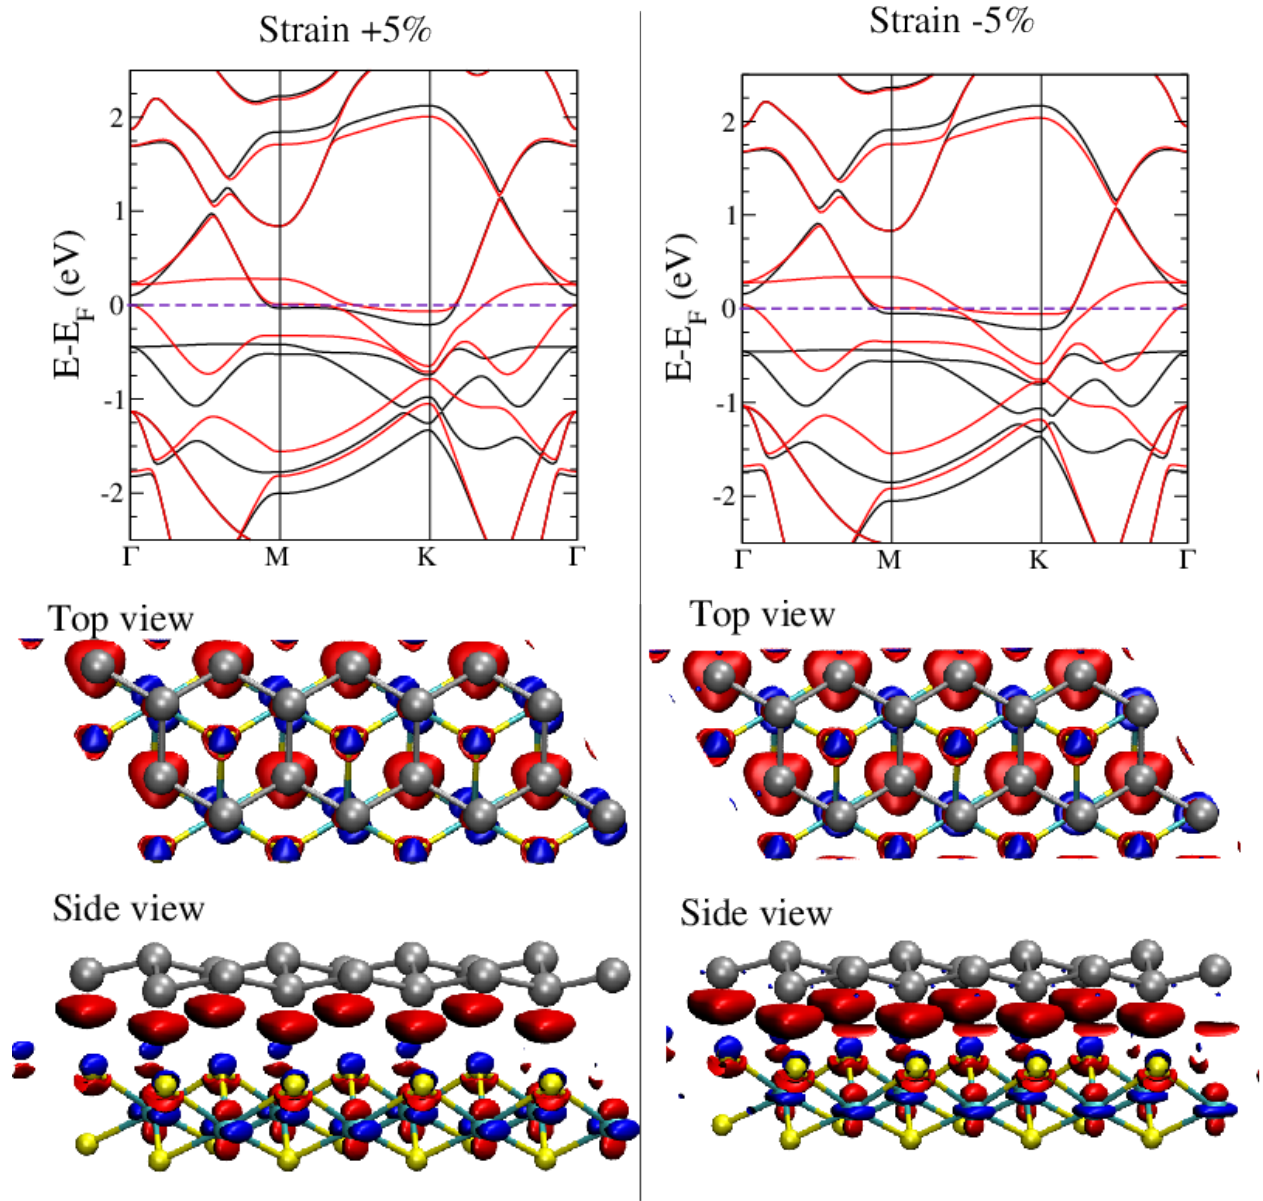

Figure 11: Electronic band structure and electronic charge difference for the  $\text{Ca}_2\text{C}/\text{Silicene}$  vdW heterostructure with vertical strain ( $\varepsilon_h$ ) of  $\pm 5\%$ . The isovalue used was  $0.025\ e\text{\AA}^{-3}$ .

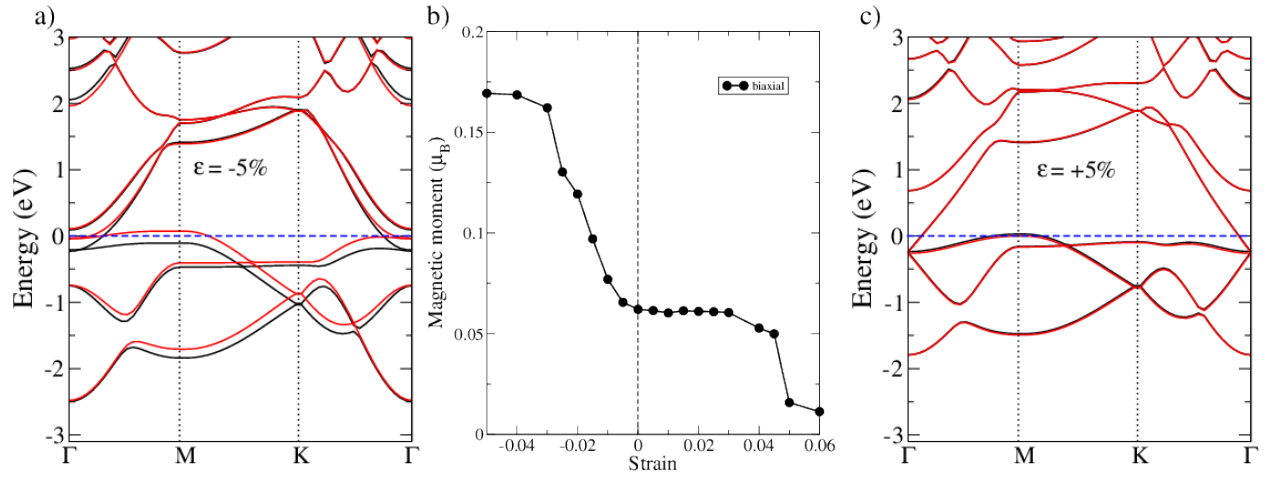

Figure 12: Electronic band structure [(a) and (c)] of the  $\text{Ca}_2\text{C}$  monolayer under planar biaxial strain ( $\varepsilon = \mp 5\%$ ) and (b) magnetic moment as a function of strain.
